# Supplementary material
Source: PubMed Central journal article supplement (PMC3786046)

## **Supplemental References**

1. Rowley JW, Oler A, Tolley ND, et al. Genome wide RNA-seq analysis of human and mouse platelet transcriptomes. *Blood* 2011.
2. Raghavachari N, Xu X, Harris A, et al. Amplified expression profiling of platelet transcriptome reveals changes in arginine metabolic pathways in patients with sickle cell disease. *Circulation* 2007;115:1551-62.
3. Watkins NA, Gusnanto A, de Bono B, et al. A HaemAtlas: characterizing gene expression in differentiated human blood cells. *Blood* 2009;113:e1-e9.
4. Lood C, Amisten S, Gullstrand B, et al. Platelet transcriptional profile and protein expression in patients with systemic lupus erythematosus: up-regulation of the type I interferon system is strongly associated with vascular disease. *Blood* 2010.
5. Krishnan S, Gaspari M, Corte AD, et al. OFFgel-based multidimensional LC-MS/MS approach to the cataloguing of the human platelet proteome for an interactomic profile. *Electrophoresis* 2011;32:686-95.
6. Gnatenko DV, Dunn JJ, McCorkle SR, Weissmann D, Perrotta PL, Bahou WF. Transcript profiling of human platelets using microarray and serial analysis of gene expression. *Blood* 2003;101:2285-93.

**Figure 1** An overview of the discovery and validation cohorts for platelet function outcomes and samples analyzed by microarray analysis (dashed outline). H e a l t h y   v o l u n t e e r s   c o h o r t s (HV1 and HV2) were challenged with 325mg/day aspirin at Duke University Medical Center as previously described(1). O u t p a t i e n t   c a r d i o l o g y (OPC) patients were treated with 81mg/day aspirin at The George Washington University. Three subgroups within the OPC cohort were selected for microarray analysis based on VerifyNow Aspirin Response Units (ARU): aspirin resistant (AR, ARU > 550), High normal (HN, 500 < ARU < 550); and Aspirin sensitive (AS, ARU < 550). \*\*HV2 subjects were screened with a test dose of 325mg aspirin and those in the 1<sup>st</sup> and 4<sup>th</sup> quartile of the 3 hour platelet function score (PFS) were selected to continue through the study protocol. \*Three HV2 subjects had participated in HV1 and were dropped from the HV2 cohort.

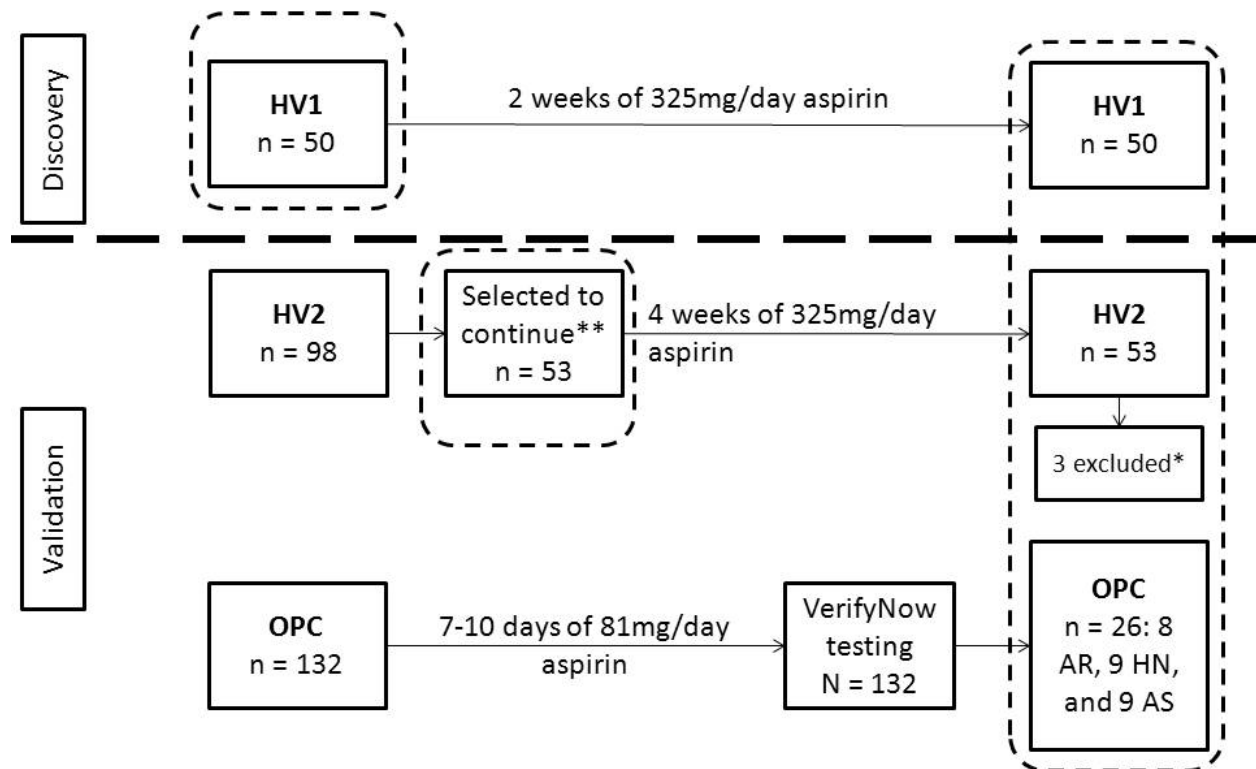

## Figure 2

Two patient cohorts from within the CATHGEN (<http://cathgen.duhs.duke.edu>) biorepository were available for microarray analysis. In 2009, an observational cohort of 224 banked, sequential samples were selected, of which 190 were available for analysis. In 2010, a nested case:control cohort of 250 cases of death/myocardial infarction and 250 age-, sex-, and race-matched controls who were free of death/MI > 2 years after cardiac catheterization was identified as part of the MURDOCK Horizon 1 Cardiovascular Disease Study(2), of which 397 were available for analysis. In 2011, dates for death, myocardial infarction, and last follow-up were ascertained from the Duke Databank for Cardiovascular Disease as previously described(3).

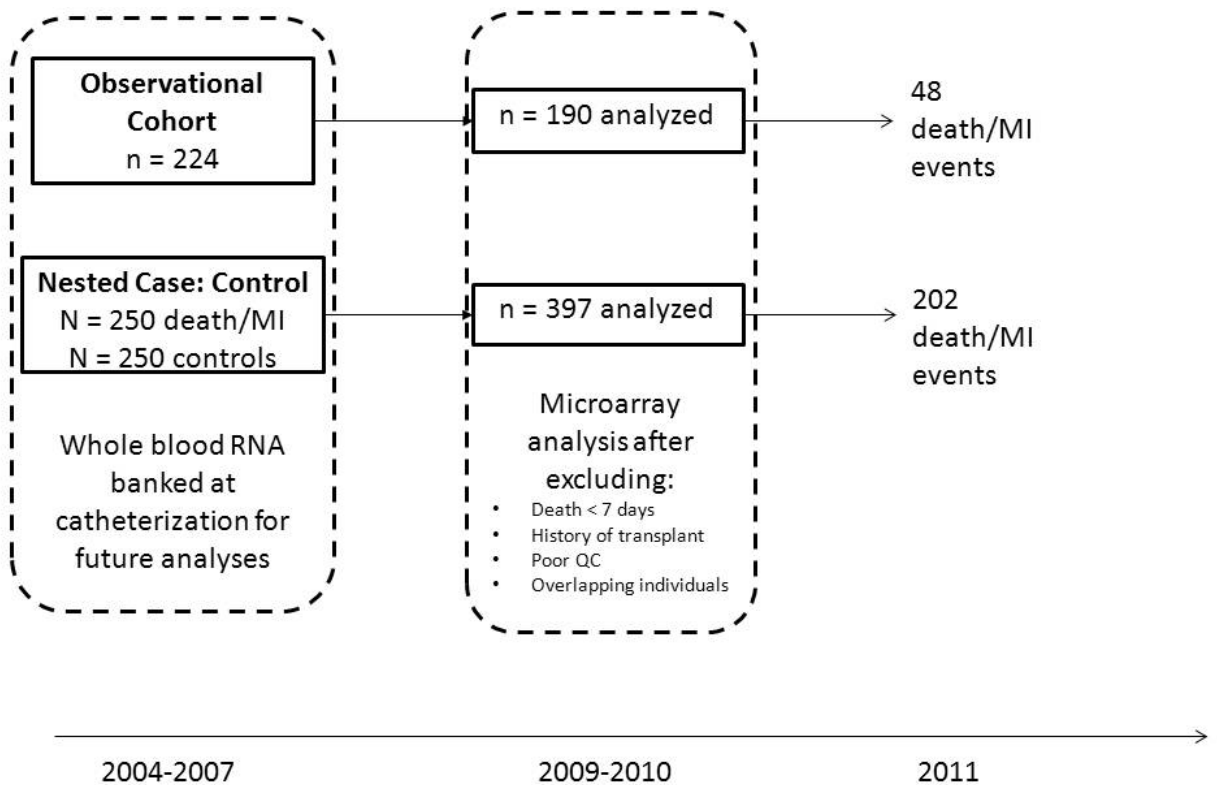

Supplement: NIHMS508184-supplement-02.pdf [file NIHMS508184-supplement-02.pdf]
