# Supplementary material
Source: PubMed Central journal article supplement (PMC3786046)
Supplement: NIHMS508184-supplement-01.pdf [file NIHMS508184-supplement-01.pdf]

## Supplementary Data

**Table 1.** Factors identified using Bayesian factor regression modeling of peripheral blood gene expression data and their characteristics.

| Factor Number | Number of genes within Factor | GO terms                                                                                                                                                                                                                                                                                                                                                                                                                                                                                                                                             | KEGG terms                |
|---------------|-------------------------------|------------------------------------------------------------------------------------------------------------------------------------------------------------------------------------------------------------------------------------------------------------------------------------------------------------------------------------------------------------------------------------------------------------------------------------------------------------------------------------------------------------------------------------------------------|---------------------------|
| 1             | 521                           | protein modification, cellular physiological process, protein transport, establishment of protein localization, protein localization organismal physiological process ubiquitin cycle, G-protein coupled receptor protein signaling pathway neurophysiological process, cell surface receptor linked signal transduction, protein metabolism intracellular protein transport, response to external stimulus, cellular protein metabolism, intracellular transport, cellular macromolecule metabolism, macromolecule metabolism, response to stimulus | NS                        |
| 2             | 142                           | cellular physiological process                                                                                                                                                                                                                                                                                                                                                                                                                                                                                                                       | NS                        |
| 3             | 16                            | NS                                                                                                                                                                                                                                                                                                                                                                                                                                                                                                                                                   | NS                        |
| 4             | 58                            | protein biosynthesis, macromolecule biosynthesis, cellular biosynthesis biosynthesis, cellular protein metabolism, protein metabolism macromolecule metabolism, cellular macromolecule metabolism                                                                                                                                                                                                                                                                                                                                                    | oxidative phosphorylation |
| 5             | 29                            | response to biotic stimulus, immune response, defense response, deoxyribonucleotide metabolism                                                                                                                                                                                                                                                                                                                                                                                                                                                       | NS                        |
| 6             | 91                            | response to biotic stimulus, immune response, defense response, response to stimulus, organismal physiological process, progesterone metabolism                                                                                                                                                                                                                                                                                                                                                                                                      | NS                        |
| 7             | 120                           | NS                                                                                                                                                                                                                                                                                                                                                                                                                                                                                                                                                   | NS                        |
| 8             | 291                           | immune response, response to external biotic stimulus, response to pest, pathogen or parasite, response to biotic stimulus, defense response, inflammatory response, response to wounding                                                                                                                                                                                                                                                                                                                                                            | NS                        |
| 9             | 153                           | NS                                                                                                                                                                                                                                                                                                                                                                                                                                                                                                                                                   | NS                        |
| 10            | 68                            | NS                                                                                                                                                                                                                                                                                                                                                                                                                                                                                                                                                   | NS                        |
| 11            | 11                            | NS                                                                                                                                                                                                                                                                                                                                                                                                                                                                                                                                                   | NS                        |
| 12            | 248                           | cellular physiological process                                                                                                                                                                                                                                                                                                                                                                                                                                                                                                                       | NS                        |
| 13            | 53                            | gas transport, oxygen transport                                                                                                                                                                                                                                                                                                                                                                                                                                                                                                                      | NS                        |

|                                                                                                                                                          |     |                                                                                           |                                        |
|----------------------------------------------------------------------------------------------------------------------------------------------------------|-----|-------------------------------------------------------------------------------------------|----------------------------------------|
| 14                                                                                                                                                       | 62  | blood coagulation, coagulation hemostasis, regulation of body fluids, platelet activation | NS                                     |
| 15                                                                                                                                                       | 99  | NS                                                                                        | NS                                     |
| 16                                                                                                                                                       | 32  | response to biotic stimulus                                                               | Nicotinate and nicotinamide metabolism |
| 17                                                                                                                                                       | 115 | NS                                                                                        | NS                                     |
| 18                                                                                                                                                       | 49  | NS                                                                                        | NS                                     |
| 19                                                                                                                                                       | 52  | NS                                                                                        | NS                                     |
| 20                                                                                                                                                       | 73  | NS                                                                                        | NS                                     |
| GO = Gene Ontology; KEGG = Kyoto Encyclopedia of Genes and Genomes; NS = no significantly associated terms/pathways (see Methods for significance level) |     |                                                                                           |                                        |

**Table 2. Validation of microarray based gene expression for Factor 14 probe sets with RT-PCR in HV2 cohort whole blood RNA.**

| Gene name | Taqman RTPCR assay name | Affymetrix microarray probe set name | Correlation coefficient | Correlation p-value |
|-----------|-------------------------|--------------------------------------|-------------------------|---------------------|
| ITGA2B    | Hs01116228_m1           | 206494_s_at                          | -0.94421                | 9.05E-26            |
| TREML1    | Hs00698316_m1           | 1555659_a_at                         | -0.90545                | 3.04E-20            |
| ITGA2B    | Hs01116228_m1           | 206493_at                            | -0.90253                | 6.28E-20            |
| MPL       | Hs00180489_m1           | 207550_at                            | -0.89971                | 1.24E-19            |
| MYL9      | Hs00697086_m1           | 201058_s_at                          | -0.89826                | 1.74E-19            |
| PCSK6     | Hs00159844_m1           | 207414_s_at                          | -0.893                  | 5.76E-19            |
| ITGA2B    | Hs01116228_m1           | 216956_s_at                          | -0.88851                | 1.53E-18            |
| CLU       | Hs00971656_m1           | 208791_at                            | -0.88747                | 1.90E-18            |
| CLU       | Hs00971656_m1           | 208792_s_at                          | -0.88153                | 6.40E-18            |
| SPARC     | Hs00277762_m1           | 200665_s_at                          | -0.87198                | 3.95E-17            |
| ALOX12    | Hs00167524_m1           | 207206_s_at                          | -0.86138                | 2.53E-16            |
| CMTM5     | Hs00370784_m1           | 230942_at                            | -0.85545                | 6.71E-16            |
| SH3BGRL2  | Hs00230283_m1           | 225354_s_at                          | -0.85496                | 7.26E-16            |
| CTDSPL    | Hs00505109_m1           | 201906_s_at                          | -0.84553                | 3.12E-15            |
| PPBP      | Hs00234077_m1           | 214146_s_at                          | -0.84171                | 5.48E-15            |
| PF4       | Hs00236998_m1           | 206390_x_at                          | -0.83419                | 1.59E-14            |
| PBX1      | Hs00295499_s1           | 212151_at                            | -0.82951                | 3.01E-14            |
| CTTN      | Hs01124225_m1           | 201059_at                            | -0.82216                | 7.89E-14            |
| SPARC     | Hs00277762_m1           | 212667_at                            | -0.80984                | 3.60E-13            |
| ITGB3     | Hs01001469_m1           | 204628_s_at                          | -0.79402                | 2.17E-12            |
| TUBB1     | Hs00258236_m1           | 230690_at                            | -0.79401                | 2.17E-12            |
| GNG11     | Hs00914578_m1           | 204115_at                            | -0.78661                | 4.78E-12            |
| TGFB111   | Hs00210887_m1           | 209651_at                            | -0.76354                | 4.63E-11            |
| PBX1      | Hs00295499_s1           | 212148_at                            | -0.76222                | 5.23E-11            |
| GP1BB     | Hs00236857_m1           | 206655_s_at                          | -0.74866                | 1.75E-10            |
| TUBB1     | Hs00258236_m1           | 208601_s_at                          | -0.74411                | 2.59E-10            |
| ELOVL7    | Hs00405151_m1           | 227180_at                            | -0.72899                | 8.91E-10            |
| THBS1     | Hs00962914_m1           | 201108_s_at                          | -0.70496                | 5.42E-09            |
| SELP      | Hs00356351_m1           | 206049_at                            | -0.69728                | 9.30E-09            |
| SLC24A3   | Hs00221141_m1           | 57588_at                             | -0.65927                | 1.07E-07            |
| CALD1     | Hs00921982_m1           | 212077_at                            | -0.64826                | 2.04E-07            |
| SLC24A3   | Hs00221141_m1           | 219090_at                            | -0.63347                | 4.65E-07            |
| MYLK      | Hs00364926_m1           | 224823_at                            | -0.6135                 | 1.33E-06            |
| ARHGAP6   | Hs00241801_m1           | 206167_s_at                          | -0.60772                | 1.77E-06            |
| PRKAR2B   | Hs00176966_m1           | 203680_at                            | -0.57731                | 7.45E-06            |
| PDE5A     | Hs00903251_m1           | 227088_at                            | -0.55683                | 1.81E-05            |
| FSTL1     | Hs00907496_m1           | 208782_at                            | -0.53538                | 4.32E-05            |
| TTC7B     | Hs00406077_m1           | 226152_at                            | -0.52431                | 6.62E-05            |

|                                                                                                                                                                                                                                                |               |             |          |          |
|------------------------------------------------------------------------------------------------------------------------------------------------------------------------------------------------------------------------------------------------|---------------|-------------|----------|----------|
| GUCY1B3                                                                                                                                                                                                                                        | Hs00168336_m1 | 203817_at   | -0.52258 | 7.07E-05 |
| MMD                                                                                                                                                                                                                                            | Hs00948031_m1 | 203414_at   | -0.39744 | 0.003528 |
| FRMD3                                                                                                                                                                                                                                          | Hs00604157_m1 | 230645_at   | -0.21862 | 0.119455 |
| SDPR                                                                                                                                                                                                                                           | Hs00190538_m1 | 222717_at   | -0.18796 | 0.182072 |
| CPNE5                                                                                                                                                                                                                                          | Hs00326218_m1 | 227189_at   | -0.07961 | 0.574802 |
| CCDC90A                                                                                                                                                                                                                                        | Hs00254417_m1 | 227451_s_at | -0.06118 | 0.666593 |
| CDC14B                                                                                                                                                                                                                                         | Hs00269351_m1 | 221556_at   | -0.04119 | 0.771874 |
| *coefficient and p-value correspond to Pearson correlation test between RMA normalized microarray expression for a given probe set and delta Ct (where higher values represent lower transcript abundance) for the corresponding RT-PCR assay. |               |             |          |          |

**Table 3. Concordance of correlations with PFS between microarray and RT-PCR based gene expression for Factor 14 genes in HV2 cohort**

| Gene Name | Affymetrix probe set ID | RT-PCR based Correlation coefficient* | Microarray based Correlation coefficient* |
|-----------|-------------------------|---------------------------------------|-------------------------------------------|
| CTDSPL    | 201906_s_at             | 0.34                                  | -0.38                                     |
| FSTL1     | 208782_at               | 0.18                                  | -0.38                                     |
| ITGA2B    | 216956_s_at             | 0.22                                  | -0.37                                     |
| TREML1    | 1555659_a_at            | 0.35                                  | -0.35                                     |
| SPARC     | 212667_at               | 0.23                                  | -0.31                                     |
| ITGA2B    | 206494_s_at             | 0.22                                  | -0.30                                     |
| ITGA2B    | 206493_at               | 0.22                                  | -0.30                                     |
| MPL       | 207550_at               | 0.30                                  | -0.29                                     |
| CTTN      | 201059_at               | 0.24                                  | -0.29                                     |
| CMTM5     | 230942_at               | 0.24                                  | -0.29                                     |
| SELP      | 206049_at               | 0.19                                  | -0.28                                     |
| CLU       | 208791_at               | 0.23                                  | -0.27                                     |
| GP1BB     | 206655_s_at             | 0.27                                  | -0.27                                     |
| ITGB3     | 204628_s_at             | 0.30                                  | -0.26                                     |
| TGFB111   | 209651_at               | 0.20                                  | -0.25                                     |
| ALOX12    | 207206_s_at             | 0.19                                  | -0.24                                     |
| PBX1      | 212151_at               | 0.26                                  | -0.24                                     |
| CPNE5     | 227189_at               | 0.33                                  | -0.24                                     |
| MYL9      | 201058_s_at             | 0.31                                  | -0.24                                     |
| CLU       | 208792_s_at             | 0.23                                  | -0.22                                     |
| PPBP      | 214146_s_at             | 0.24                                  | -0.22                                     |
| SH3BGRL2  | 225354_s_at             | 0.22                                  | -0.20                                     |
| PF4       | 206390_x_at             | 0.30                                  | -0.20                                     |
| THBS1     | 201108_s_at             | 0.13                                  | -0.20                                     |
| SLC24A3   | 57588_at                | 0.06                                  | -0.20                                     |
| PBX1      | 212148_at               | 0.26                                  | -0.19                                     |
| SPARC     | 200665_s_at             | 0.23                                  | -0.18                                     |
| GNG11     | 204115_at               | 0.24                                  | -0.16                                     |
| TUBB1     | 208601_s_at             | 0.16                                  | -0.16                                     |
| PCSK6     | 207414_s_at             | 0.28                                  | -0.15                                     |
| SLC24A3   | 219090_at               | 0.06                                  | -0.15                                     |
| PDE5A     | 227088_at               | 0.20                                  | -0.14                                     |
| GUCY1B3   | 203817_at               | 0.17                                  | -0.12                                     |
| CALD1     | 212077_at               | 0.13                                  | -0.11                                     |
| PRKAR2B   | 203680_at               | 0.23                                  | -0.10                                     |
| TTC7B     | 226152_at               | 0.00                                  | -0.10                                     |
| ARHGAP6   | 206167_s_at             | 0.20                                  | -0.10                                     |
| TUBB1     | 230690_at               | 0.16                                  | -0.09                                     |

|         |             |       |       |
|---------|-------------|-------|-------|
| ELOVL7  | 227180_at   | 0.20  | -0.08 |
| MYLK    | 224823_at   | 0.22  | -0.05 |
| MMD     | 203414_at   | 0.21  | -0.05 |
| SDPR    | 222717_at   | 0.21  | -0.05 |
| FRMD3   | 230645_at   | -0.12 | 0.00  |
| CDC14B  | 221556_at   | 0.13  | 0.18  |
| CCDC90A | 227451_s_at | -0.14 | 0.28  |

\*Correlation coefficients represent Pearson correlations between gene expression based on microarray or RTPCR for Factor 14 transcripts and post-aspirin platelet function score (PFS) in HV2 cohort.

**Table 4. Comparison of platelet and megakaryocyte genes with Factor 14**

| Gene set description*        | Number of features | Number of overlapping genes with Factor 14*** | GSEA NES | GSEA P-value | GSEA Q-value** | Reference    |
|------------------------------|--------------------|-----------------------------------------------|----------|--------------|----------------|--------------|
| Factor 14 genes (reference)  | 62                 | 62                                            | 2.23     | <0.0001      | <0.0001        | N/A          |
| Platelet genes (A)           | 248                | 25                                            | 2.18     | <0.0001      | <0.0001        | <sup>1</sup> |
| Platelets specific genes (B) | 36                 | 12                                            | 2.12     | <0.0001      | 0.001          | <sup>2</sup> |
| Megakaryocytes genes (C)     | 261                | 20                                            | 2.06     | <0.0001      | 0.001          | <sup>3</sup> |
| Platelet genes (D)           | 196                | 14                                            | 1.97     | <0.0001      | 0.008          | <sup>4</sup> |
| Platelet proteins (E)        | 99                 | 31                                            | 1.84     | <0.0001      | 0.01           | <sup>5</sup> |
| Platelet genes (F)           | 36                 | 6                                             | 1.73     | 0.004        | 0.02           | <sup>6</sup> |

GSEA = Gene Set Enrichment Analysis (GSEA); NES = Normalized enrichment score; \*The gene lists were as follows: A) the abundant platelet transcripts identified by RNA-sequencing<sup>1</sup>; B) platelet-specific transcripts identified in platelets of sickle cell disease patients or controls<sup>2</sup>; C) megakaryocyte-specific genes<sup>3</sup>; D) abundant platelet genes identified in platelets of patients with systemic lupus or controls<sup>4</sup>; or E) platelet proteins from healthy donors<sup>5</sup>; F) the top 50 genes identified in purified platelets from healthy volunteers<sup>6</sup>; \*\* refers to false discovery rate q-value; \*\*\*p ≤ 0.001 for all overlaps.

| <b>Table 5. Comparison of Factor 14 genes with non-platelet derived peripheral blood cell-type genes*.</b>                  |                           |                                                    |                 |                        |                         |
|-----------------------------------------------------------------------------------------------------------------------------|---------------------------|----------------------------------------------------|-----------------|------------------------|-------------------------|
| <b>Gene set description*</b>                                                                                                | <b>Number of features</b> | <b>Number of overlapping genes with Factor 14*</b> | <b>GSEA NES</b> | <b>GSEA P-value **</b> | <b>GSEA Q-value ***</b> |
| CD4 <sup>+</sup> Th lymphocytes                                                                                             | 36                        | 0                                                  | -0.7            | 0.7                    | 0.7                     |
| CD8 <sup>+</sup> Tc lymphocytes                                                                                             | 4                         | 0                                                  | 0.7             | 0.7                    | 0.8                     |
| CD14 <sup>+</sup> Monocytes                                                                                                 | 164                       | 0                                                  | 0.6             | 0.8                    | 0.9                     |
| CD19 <sup>+</sup> B lymphocytes                                                                                             | 53                        |                                                    | 0.5             | 1.0                    | 0.9                     |
| CD56 <sup>+</sup> NK cells                                                                                                  | 605                       | 0                                                  | 1.4             | 0.2                    | 0.2                     |
| CD66 <sup>+</sup> granulocytes                                                                                              | 257                       | 0                                                  | 1.7             | 0.03                   | 0.03                    |
| Erythroblasts                                                                                                               | 38                        | 0                                                  | 1.3             | 0.2                    | 0.2                     |
| *Cell-type specific gene lists were obtained from Watkins et al <sup>3</sup> ; Abbreviations and footnotes are per Table 2. |                           |                                                    |                 |                        |                         |



| <b>Table 6. Baseline characteristics in CATHGEN cohorts and their association with Factor 14 levels</b>                                                              |                                      |                                       |                                                |
|----------------------------------------------------------------------------------------------------------------------------------------------------------------------|--------------------------------------|---------------------------------------|------------------------------------------------|
| <b>Variable</b>                                                                                                                                                      | <b>Case:Control Cohort (n = 397)</b> | <b>Observational cohort (n = 190)</b> | <b>P-value for association with Factor 14*</b> |
| <b>Age (years, median, [IQR])</b>                                                                                                                                    | 65 [57 -73]                          | 56 [47 -67]                           | 0.15                                           |
| <b>Hypertension (%)</b>                                                                                                                                              | 70.3%                                | 70.5%                                 | 0.23                                           |
| <b>CAD</b>                                                                                                                                                           | 26%                                  | 78%                                   | 0.47                                           |
| <b>Diabetes (%)</b>                                                                                                                                                  | 34.3%                                | 23.2%                                 | 0.14                                           |
| <b>RACE (%)</b>                                                                                                                                                      |                                      |                                       |                                                |
| <b>White</b>                                                                                                                                                         | 74.3%                                | 66.8%                                 | Reference                                      |
| <b>African-American</b>                                                                                                                                              | 21.7%                                | 26.8%                                 | 2.13e-06                                       |
| <b>Other</b>                                                                                                                                                         | 4.0%                                 | 6.3%                                  | 0.53                                           |
| <b>Female (%)</b>                                                                                                                                                    | 32.2%                                | 41.1%                                 | 7.37e-06                                       |
| <b>Smoking history (%)</b>                                                                                                                                           | 47.9%                                | 53.7%                                 | 0.06                                           |
| <b>Hyperlipidemia (%)</b>                                                                                                                                            | 61.0%                                | 61.6%                                 | 0.37                                           |
| *The combined Case:Control and Observational cohorts were used to test for associations with Factor 14 levels, while controlling for cohort using linear regression. |                                      |                                       |                                                |

| <b>Table 7. Factor 14 individual probe sets are associated with death or myocardial infarction in two independent datasets.</b> |                  |             |                    |               |                      |
|---------------------------------------------------------------------------------------------------------------------------------|------------------|-------------|--------------------|---------------|----------------------|
| Probe set ID                                                                                                                    | Gene name        | Odds Ratio* | Odds Ratio p-value | Hazard Ratio* | Hazard Ratio p-value |
| Factor 14                                                                                                                       | n/a              | 1.21        | 0.028036541        | 1.47          | 0.001454             |
| Factor 14 individual probe set associations                                                                                     |                  |             |                    |               |                      |
| 201058_s_at                                                                                                                     | <i>MYL9</i>      | 1.30        | 0.00400748         | 1.75          | 7.65E-06             |
| 206494_s_at                                                                                                                     | <i>ITGA2B</i>    | 1.37        | 0.00351754         | 1.83          | 1.88E-05             |
| 216956_s_at                                                                                                                     | <i>ITGA2B</i>    | 1.52        | 0.000531982        | 1.82          | 3.09E-05             |
| 230942_at                                                                                                                       | <i>CMTM5</i>     | 1.31        | 0.066298986        | 2.52          | 3.50E-05             |
| 1555659_a_at                                                                                                                    | <i>TREML1</i>    | 1.36        | 0.010689841        | 1.89          | 5.63E-05             |
| 212573_at                                                                                                                       | <i>ENDOD1</i>    | 1.94        | 4.95E-05           | 2.10          | 0.000188             |
| 212148_at                                                                                                                       | <i>PBX1</i>      | 1.46        | 2.45E-06           | 1.47          | 0.0002               |
| 226188_at                                                                                                                       | <i>LGALSL</i>    | 1.38        | 0.071992059        | 2.62          | 0.000206             |
| 212151_at                                                                                                                       | <i>PBX1</i>      | 1.65        | 1.48E-05           | 1.73          | 0.000281             |
| 206493_at                                                                                                                       | <i>ITGA2B</i>    | 1.46        | 0.002887947        | 1.83          | 0.000351             |
| 210986_s_at                                                                                                                     | <i>TPM1</i>      | 1.87        | 1.45E-05           | 1.83          | 0.000422             |
| 57588_at                                                                                                                        | <i>SLC24A3</i>   | 1.15        | 0.440525089        | 2.19          | 0.000472             |
| 209651_at                                                                                                                       | <i>TGFB111</i>   | 1.32        | 0.015158949        | 1.63          | 0.000616             |
| 203819_s_at                                                                                                                     | <i>IGF2BP3</i>   | 1.45        | 0.033315085        | 1.86          | 0.000619             |
| 206049_at                                                                                                                       | <i>SELP</i>      | 1.46        | 0.021063226        | 2.01          | 0.000636             |
| 1552773_at                                                                                                                      | <i>CLEC4D</i>    | 1.48        | 0.00175683         | 1.74          | 0.000708             |
| 226152_at                                                                                                                       | <i>TTC7B</i>     | 1.43        | 0.029162426        | 2.06          | 0.000931             |
| 204628_s_at                                                                                                                     | <i>ITGB3</i>     | 1.41        | 0.059389555        | 1.81          | 0.00112              |
| 208791_at                                                                                                                       | <i>CLU</i>       | 1.56        | 0.002006075        | 1.84          | 0.001166             |
| 206655_s_at                                                                                                                     | <i>GP1BB</i>     | 1.32        | 0.043694557        | 1.69          | 0.001235             |
| 210387_at                                                                                                                       | <i>HIST1H2BG</i> | 1.74        | 0.000124728        | 1.98          | 0.001269             |
| 201108_s_at                                                                                                                     | <i>THBS1</i>     | 1.39        | 0.02328534         | 1.87          | 0.001633             |
| 208792_s_at                                                                                                                     | <i>CLU</i>       | 1.51        | 0.003791609        | 1.80          | 0.001869             |
| 219090_at                                                                                                                       | <i>SLC24A3</i>   | 1.16        | 0.373804241        | 2.01          | 0.001907             |

|             |                  |      |             |      |          |
|-------------|------------------|------|-------------|------|----------|
| 225974_at   | <i>TMEM64</i>    | 0.59 | 0.008235562 | 0.41 | 0.002877 |
| 207206_s_at | <i>ALOX12</i>    | 1.21 | 0.138154505 | 1.74 | 0.003564 |
| 229778_at   | <i>C12orf39</i>  | 1.39 | 0.004259803 | 1.58 | 0.005073 |
| 215779_s_at | <i>HIST1H2BG</i> | 1.68 | 0.002837678 | 1.81 | 0.005208 |
| 37966_at    | <i>PARVB</i>     | 1.04 | 0.771921449 | 1.81 | 0.005396 |
| 225354_s_at | <i>SH3BGRL2</i>  | 1.34 | 0.049135136 | 1.79 | 0.00551  |
| 212667_at   | <i>SPARC</i>     | 1.25 | 0.167170138 | 1.78 | 0.005604 |
| 207414_s_at | <i>PCSK6</i>     | 1.23 | 0.150039721 | 1.72 | 0.006252 |
| 235331_x_at | <i>PCGF5</i>     | 1.93 | 5.27E-06    | 1.42 | 0.006562 |
| 200665_s_at | <i>SPARC</i>     | 1.44 | 0.008859476 | 1.72 | 0.006808 |
| 207808_s_at | <i>PROS1</i>     | 1.45 | 0.018336331 | 1.58 | 0.006933 |
| 212077_at   | <i>CALD1</i>     | 1.11 | 0.338890694 | 1.52 | 0.006972 |
| 201906_s_at | <i>CTDSPL</i>    | 1.30 | 0.11440241  | 1.90 | 0.007299 |
| 241133_at   | <i>TRBV27</i>    | 1.28 | 0.019888406 | 1.52 | 0.011429 |
| 206390_x_at | <i>PF4</i>       | 1.13 | 0.398156787 | 1.85 | 0.0117   |
| 211026_s_at | <i>MGLL</i>      | 1.16 | 0.327461963 | 1.85 | 0.012801 |
| 230645_at   | <i>FRMD3</i>     | 1.85 | 0.000131807 | 1.79 | 0.014483 |
| 206110_at   | <i>HIST1H3H</i>  | 1.72 | 3.26E-05    | 1.57 | 0.018138 |
| 208601_s_at | <i>TUBB1</i>     | 1.16 | 0.201369942 | 1.50 | 0.01831  |
| 203680_at   | <i>PRKAR2B</i>   | 1.43 | 0.005278287 | 1.54 | 0.025644 |
| 227180_at   | <i>ELOVL7</i>    | 1.25 | 0.070697319 | 1.49 | 0.032551 |
| 214146_s_at | <i>PPBP</i>      | 1.55 | 0.000423437 | 1.83 | 0.037707 |
| 227189_at   | <i>CPNE5</i>     | 0.71 | 0.079532372 | 1.63 | 0.03795  |
| 208782_at   | <i>FSTL1</i>     | 1.28 | 0.086692126 | 1.53 | 0.039651 |
| 1560262_at  | <i>LRRC32</i>    | 1.24 | 0.155422462 | 1.55 | 0.050918 |
| 201059_at   | <i>CTTN</i>      | 1.16 | 0.299273772 | 1.53 | 0.057153 |
| 220496_at   | <i>CLEC1B</i>    | 1.50 | 0.002955397 | 1.43 | 0.079647 |
| 212651_at   | <i>RHOBTB1</i>   | 1.32 | 0.08218736  | 1.43 | 0.096564 |
| 204115_at   | <i>GNG11</i>     | 1.41 | 0.004779687 | 1.45 | 0.118268 |
| 206167_s_at | <i>ARHGAP6</i>   | 1.14 | 0.422952376 | 1.36 | 0.151355 |

|             |                  |      |             |      |          |
|-------------|------------------|------|-------------|------|----------|
| 227088_at   | <i>PDE5A</i>     | 1.35 | 0.046937627 | 1.37 | 0.151501 |
| 203817_at   | <i>GUCY1B3</i>   | 1.28 | 0.098280545 | 1.35 | 0.160362 |
| 207550_at   | <i>MPL</i>       | 1.05 | 0.717720328 | 1.28 | 0.210728 |
| 1553842_at  | <i>BEND2</i>     | 1.42 | 0.079659139 | 1.33 | 0.233    |
| 212813_at   | <i>JAM3</i>      | 0.97 | 0.872083306 | 1.34 | 0.240894 |
| 230690_at   | <i>TUBB1</i>     | 1.09 | 0.589122948 | 1.31 | 0.265404 |
| 207156_at   | <i>HIST1H2AG</i> | 1.54 | 0.004128653 | 1.27 | 0.303256 |
| 225166_at   | <i>ARHGAP18</i>  | 1.53 | 0.034773026 | 1.30 | 0.338505 |
| 224823_at   | <i>MYLK</i>      | 1.24 | 0.099105304 | 1.21 | 0.357528 |
| 227451_s_at | <i>CCDC90A</i>   | 1.07 | 0.751398281 | 0.76 | 0.381367 |
| 228708_at   | <i>RAB27B</i>    | 1.21 | 0.257379973 | 0.84 | 0.546707 |
| 207815_at   | <i>PF4V1</i>     | 1.07 | 0.397575492 | 1.07 | 0.581265 |
| 221556_at   | <i>CDC14B</i>    | 0.78 | 0.197214947 | 0.86 | 0.60266  |
| 222717_at   | <i>SDPR</i>      | 1.08 | 0.545883997 | 1.10 | 0.679631 |
| 206272_at   | <i>RAB4A</i>     | 1.54 | 0.020878373 | 0.91 | 0.803266 |
| 214974_x_at | <i>CXCL5</i>     | 0.88 | 0.201323204 | 0.97 | 0.867518 |
| 205442_at   | <i>MFAP3L</i>    | 0.90 | 0.409405359 | 1.01 | 0.968416 |
| 203414_at   | <i>MMD</i>       | 1.19 | 0.292053865 | 1.01 | 0.985414 |

\*Individual Factor 14 probe sets were associated with death or myocardial infarction in the case control and observational cohorts, yielding odds ratios and hazards ratios, respectively. For each probe set analyses were adjusted for log(platelet count), race, and sex.

| <b>Table 8. Net Reclassification Table for combined CATHGEN cohorts</b> |     |        |      |                  |
|-------------------------------------------------------------------------|-----|--------|------|------------------|
| Factor 14                                                               |     |        |      |                  |
|                                                                         | 10% | 10-20% | >20% | % Reclassified   |
| 10%                                                                     | 10  | 4      | 0    | 29               |
| 10-20%                                                                  | 4   | 55     | 6    | 15               |
| >20%                                                                    | 0   | 14     | 474  | 3                |
| Net Reclassification Index                                              |     |        |      | 4.6% (p = 0.007) |
| <i>ITGA2B</i>                                                           |     |        |      |                  |
|                                                                         | 10% | 10-20% | >20% | % Reclassified   |
| 10%                                                                     | 8   | 5      | 1    | 43               |
| 10-20%                                                                  | 13  | 42     | 10   | 35               |
| >20%                                                                    | 1   | 24     | 463  | 5                |
| Net Reclassification Index                                              |     |        |      | 7.5% (p = 0.002) |
